# Supplementary material for: In situpurification to eliminate the influence of impurities in solution-processed organic crystals for transistor arrays
Source: Royal Society of Chemistry journal article supplement (doi:10.1039/c2tc00384h), 2012-12-07
Supplement: c2tc00384h.pdf [file c2tc00384h.pdf]

## Supporting information

### **In situ purification to eliminate the influence of impurities in solution-processed organic crystals for transistor arrays**

**Yun Li,<sup>a,b,\*</sup> Chuan Liu,<sup>a,\*</sup> Micael V. Lee,<sup>a</sup> Yong Xu,<sup>a</sup> Xu Wang,<sup>a</sup> Yi Shi<sup>b</sup> and Kazuhito Tsukagoshi<sup>a</sup>**

<sup>a</sup> *International Center for Materials Nanoarchitectonics (WPI-MANA), National Institute for Materials Science (NIMS), Tsukuba, Ibaraki 305-0044, Japan.*

*E-mail: TSUKAGOSHI.Kazuhito@nims.go.jp*

<sup>b</sup> *School of Electronic Science and Engineering, Nanjing University, Nanjing 210093, People's Republic of China.*

*E-mail: yshi@nju.edu.cn*

*\* These authors contributed equally to this work.*

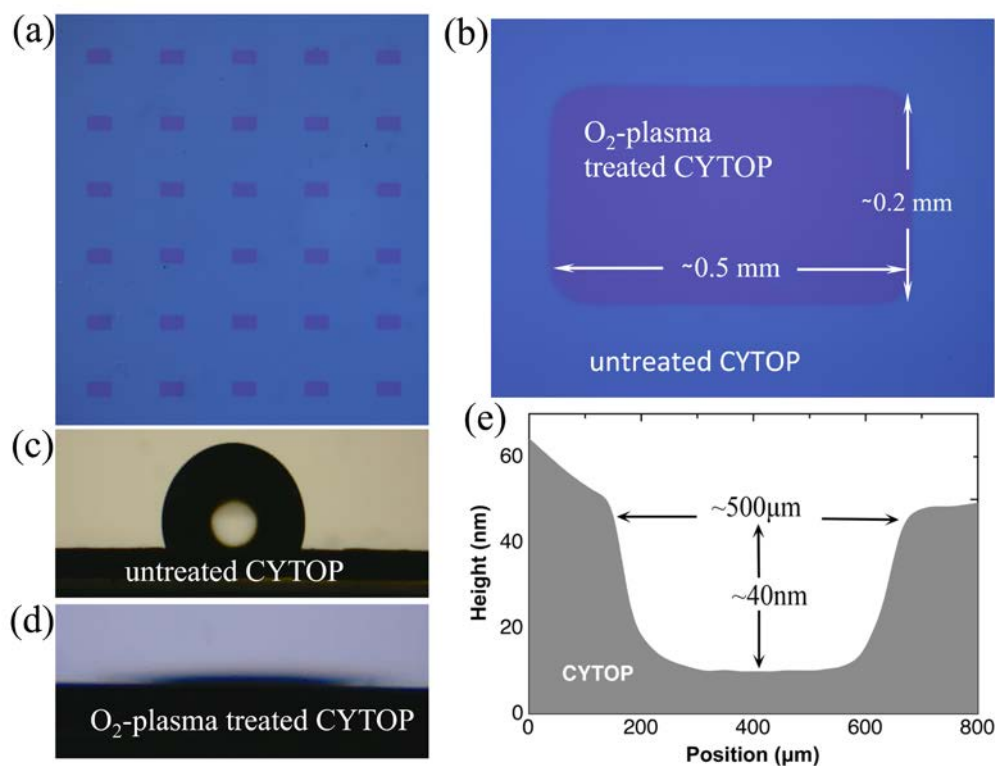

**Figure S1.** (a) (b) Microscopy images of the CYTOP film with patterned arrays after the O<sub>2</sub>-plasma treatment. Water contact angles of an untreated (c) and plasma-treated (d) CYTOP surface. (e) Cross-sectional profile of a patterned region.

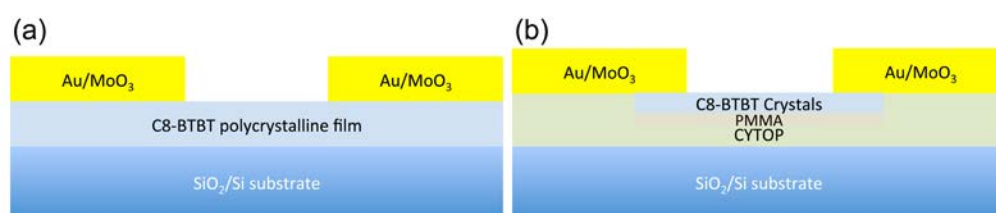

**Figure S2.** Schematics of the device structures for C8-BTBT polycrystalline thin films from spin-coating bare C8-BTBT solutions (a) and for patterned C8-BTBT crystals using direct spin-coating from C8-BTBT/PMMA blends (b).

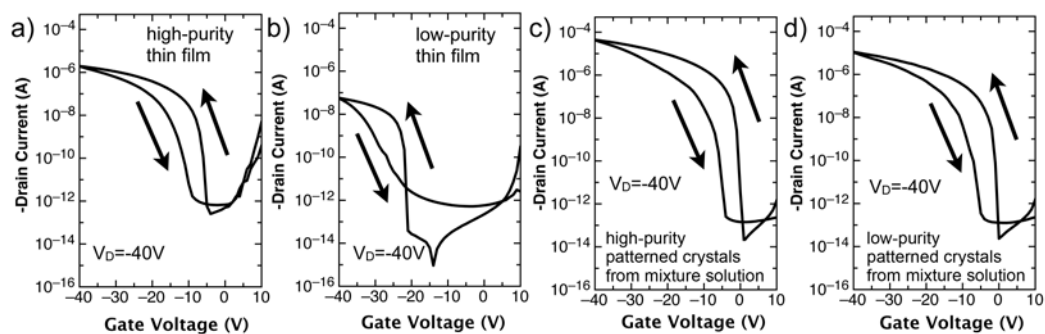

**Figure S3.** Typical transfers curves for high- (a) and low-purity (b) polycrystalline thin films of C8-BTBT. Obvious increase in hysteresis can be observed. Meanwhile, the hysteresis in the devices based on high- (c) and low-purity (d) patterned C8-BTBT crystals was similar with each other.

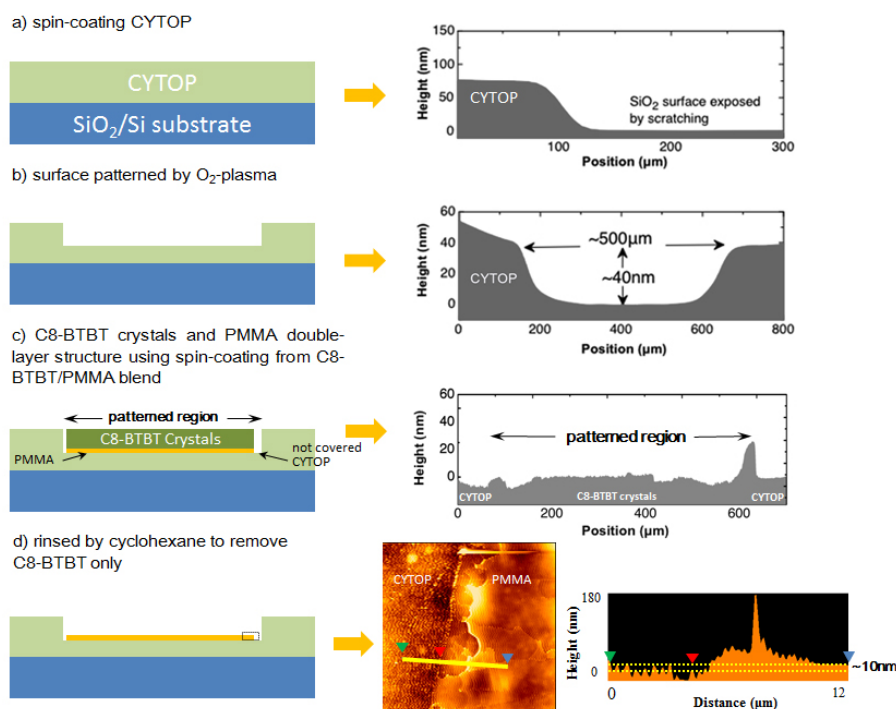

**Figure S4.** (a) Schematic illustration of the process of spin-coating a CYTOP layer (left); the cross-sectional profile of a CYTOP layer partly exposed by scratching, indicating a ~75 nm thick CYTOP (right). (b) The process of oxygen-plasma treatment that results in a patterned CYTOP layer (left); the cross-sectional profile of a patterned region of CYTOP, showing the depth of ~40 nm (right). (c) The process of spin-coating from C8-BTBT/PMMA blends that produces C8-BTBT plate-like crystals and PMMA double-layer structure (the gap between the double-layer structures and the CYTOP edge is the CYTOP region with no coverage of C8-BTBT or PMMA) (left); the cross-sectional profile of a patterned region with C8-BTBT plate-crystals (right). (d) In order to measure the PMMA thickness underneath the C8-BTBT crystals, we rinsed the sample by cyclohexane to remove C8-BTBT only (left); Atomic force microscopy (AFM) image (20 μm × 20 μm) of the edge between CYTOP and PMMA (highlighted by the black dotted square in the schematic illustration in Figure R1d) (middle); The AFM profile taken across the line in the AFM image, showing a very thin PMMA layer with the thickness of ~10nm (right).

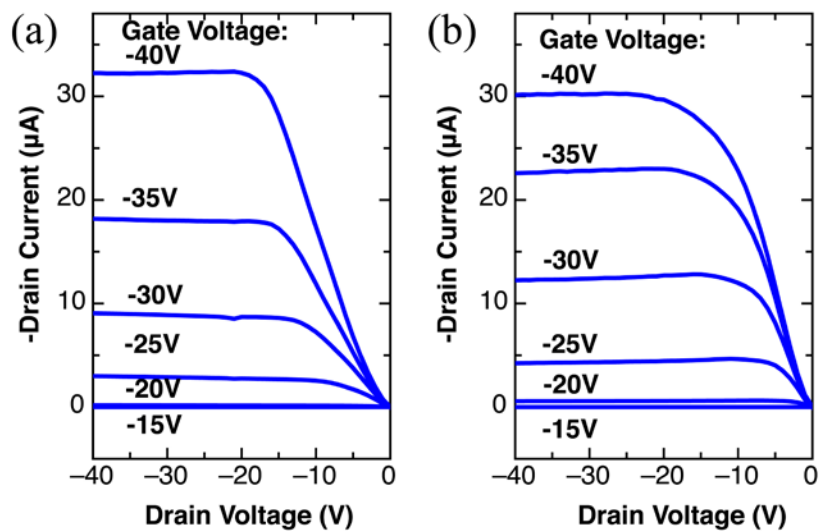

**Figure S5.** Output curves of the FET arrays with patterned C8-BTBT plate-like crystals spin-coated from high- (a) and low-purity (b) C8-BTBT solutions blended with PMMA.

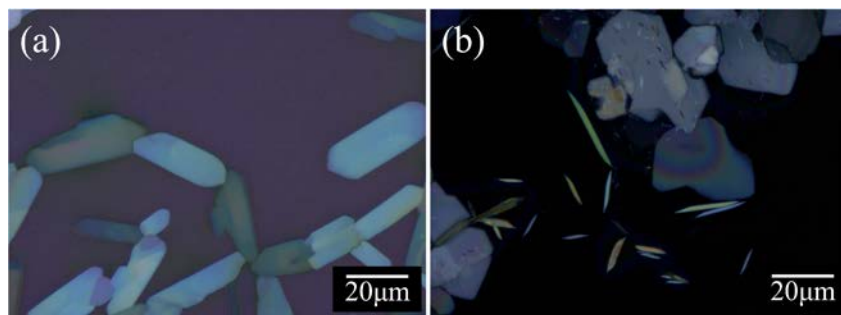

**Figure S6.** Organic crystals grown from high- (a) and low-purity (b) C8-BTBT using solvent-vapor annealing.

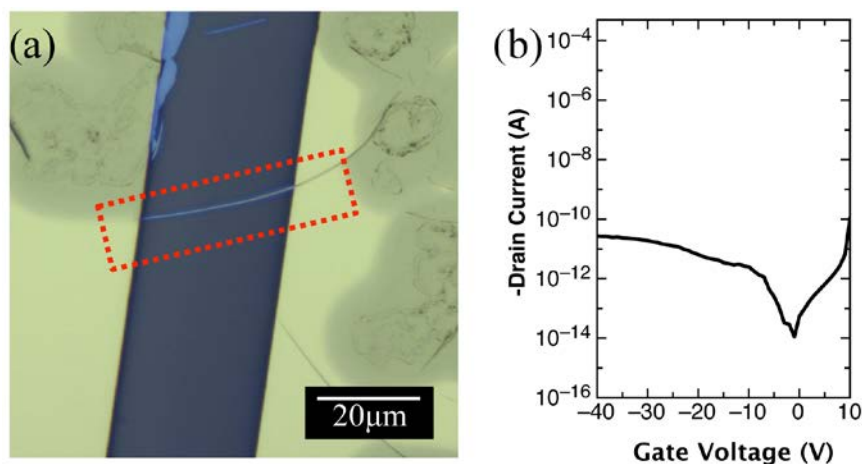

**Figure S7.** (a) Microscopy image of an isolated needle-like crystal of impurity (highlighted by red-dotted square) bridging the source and drain electrodes. (b) Electrical characteristics of the impurity crystal, which exhibited low electrical conduction and almost no transistor behavior.

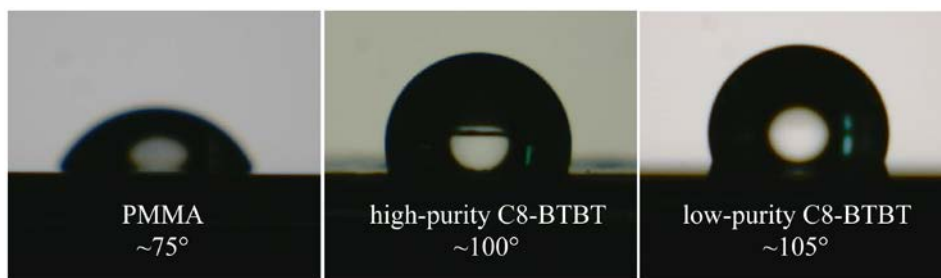

**Figure S8.** Water contact angles of thin films of bare PMMA (left), high-purity (middle) and low-purity (right) C8-BTBT. The PMMA surface has the smallest contact angle, which indicates that PMMA has a higher surface energy than C8-BTBT and impurity molecules.
